# Supplementary material
Source: Elsevier journal article supplement (https://www.sciencedirect.com/science/article/pii/S2603924918300533)
Supplement: mmc1 [file S2603924918300533:mmc1.pdf]

# CUESTIONARIO DEL PACIENTE

## INSTRUCCIONES DE CUMPLIMENTACIÓN

A continuación, se le presentarán una serie de cuestiones relacionadas con su fibrilación auricular no valvular y con su tratamiento anticoagulante.

Por favor, marque para cada cuestión la opción que más se ajuste a su opinión. En algunas preguntas tendrá que indicar un número.

No existen respuestas correctas o incorrectas, por lo que responda con total sinceridad lo que usted piense sin dejar ninguna pregunta sin contestar.

Por favor, indique si usted es un paciente o un familiar/cuidador que colabora en el tratamiento del paciente:

Soy paciente

Soy familiar/cuidador

En el caso de que sea cuidador, por favor, responda a las siguientes cuestiones sobre el paciente.

## Criterios de inclusión

¿Qué tipo de fibrilación auricular le han diagnosticado?

☐ Fibrilación auricular VALVULAR

☐ Fibrilación auricular NO-VALVULAR (Presencia de arritmia sin enfermedad o prótesis en las válvulas del corazón)

¿Qué tipo de tratamiento anticoagulante recibe?

☐ Anticoagulante oral de acción directa [Ej. Pradaxa<sup>®</sup> (dabigatran), Eliquis<sup>®</sup> (apixaban), Xarelto<sup>®</sup> (rivaroxaban), Lixiana<sup>®</sup> (edoxaban)]

☐ Agonistas de la vitamina K [Ej. Sintrom<sup>®</sup> (acenocumarol), Aldocumar<sup>®</sup> (warfarina)]

☐ Ninguno de estos tratamientos

Los pacientes serán elegibles para el estudio y podrán continuar con el cuestionario sólo si responden a la pregunta 1.1 con la opción B y a la 1.2 con la opción A o B.

## VARIABLES SOCIODEMOGRÁFICAS

**Edad** \_\_\_\_\_ años

### **Género**

Hombre ☐ Mujer ☐

### **Comunidad autónoma en la que reside**

[Desplegable con las diferentes opciones]

### **¿Qué asociación le ha invitado a participar en el estudio?**

[Desplegable con las diferentes opciones]

### **Área de residencia**

☐ Rural (aproximadamente menos de 10.000 habitantes)

☐ Urbana o semi-urbana (aproximadamente más de 10.000 habitantes)

### **¿Cómo es el desplazamiento desde su casa a su centro de salud?**

A. Medio de desplazamiento:

☐ Coche/autobús

☐ A pie

B. Distancia aproximada: \_\_\_\_\_ Km

C. Tiempo aproximado: Horas \_\_\_\_\_ minutos \_\_\_\_\_

D. Necesidad de ayuda:

☐ Puedo acudir por mis propios medios (Solo/a)

☐ Necesito ayuda para desplazarme (con acompañante)

### **Nivel MÁXIMO de estudios:**

☐ Sin estudios

☐ Primaria (EGB o similar)

☐ Secundaria (BUP, COU, ESO o similar) o Formación profesional

☐ Estudios universitarios o superiores

☐ Prefiero no contestar

### **Situación laboral**

- ☐ Estudiante
- ☐ Trabajador/a en activo
- ☐ Desempleado
- ☐ Incapacidad laboral
- ☐ Jubilado/a
- ☐ Tareas del hogar

→ Si D es afirmativo:

¿Es su incapacidad laboral debida a ictus o embolismos sufridos en otras partes del cuerpo?

Sí ☐ No ☐

→ Si E es afirmativo y edad  $\leq 65$  años:

¿Su jubilación anticipada ha sido debida ictus o embolismos sufridos en otras partes del cuerpo?

Sí ☐ No ☐

**Aproximadamente, ¿A cuánto ascienden sus ingresos mensuales?**

- ☐ Menos de 500 €/mes
- ☐ De 500€ a 999 €/mes
- ☐ De 1000€ a 1499 €/mes
- ☐ De 1500€ a 1999 €/mes
- ☐ De 2000€ a 2500 €/mes
- ☐ Más de 2500 €/mes
- ☐ Prefiero no contestar

## VARIABLES CLÍNICAS

**Aproximadamente, ¿Hace cuánto tiempo le diagnosticaron su fibrilación auricular no valvular?**

- ☐ Menos de 6 meses
- ☐ 6-11 meses
- ☐ 1-2 años
- ☐ Más de 2 años

**¿Ha sufrido alguno de los siguientes accidentes cardiovasculares?** En caso afirmativo, indique cuántos (puede marcar varias opciones)

- |                                                                                                                                             |                                   |
|---------------------------------------------------------------------------------------------------------------------------------------------|-----------------------------------|
| <input type="checkbox"/> Ictus con secuelas (ictus o Infarto cerebral que ocasiona trastornos del movimiento, visuales, del lenguaje, etc.) | Número de eventos sufridos: _____ |
| <input type="checkbox"/> Ictus sin secuelas (ictus o infarto cerebral leve, de escasa intensidad y/o duración)                              | Número de eventos sufridos: _____ |
| <input type="checkbox"/> Embolia en otras partes del cuerpo (por ejemplo, brazos, piernas o pulmones)                                       | Número de eventos sufridos: _____ |
| <input type="checkbox"/> Hemorragia craneal (derrame sanguíneo en el cerebro que no ocasiona un ictus)                                      | Número de eventos sufridos: _____ |
| <input type="checkbox"/> Infarto de miocardio (infarto de corazón)                                                                          | Número de eventos sufridos: _____ |

**¿Presenta alguna de las siguientes enfermedades?** (puede marcar varias opciones)

- ☐ Diabetes
- ☐ Insuficiencia renal
- ☐ Enfermedades cardiovasculares (por ejemplo, insuficiencia cardíaca, cardiopatía isquémica, enfermedad vascular periférica, etc.)
- ☐ Enfermedad Pulmonar Obstructiva Crónica (EPOC)
- ☐ Hipertensión arterial
- ☐ Obesidad
- ☐ Colesterol elevado
- ☐ Ansiedad/estrés/depresión

## INFORMACIÓN

**¿Cuál es su fuente de información PRINCIPAL acerca de su fibrilación auricular no valvular y el tratamiento anticoagulante?** (Cuidado, hábitos alimenticios, posibles complicaciones, dosis, etc.)

*(Respuesta única)*

- ☐ Médico Atención Primaria
- ☐ Cardiólogo/a
- ☐ Internista
- ☐ Hematólogo/a
- ☐ Médico de Urgencia
- ☐ Neurólogo/a
- ☐ Enfermero/a
- ☐ Asociación de pacientes
- ☐ Farmacéutico
- ☐ Internet

A continuación, se le presentarán una serie de afirmaciones. Indique, desde su punto de vista, cómo de acuerdo está con cada una de ellas.

**¿Cómo considera que es la información recibida por parte de su médico o profesional sanitario sobre su fibrilación auricular no valvular y tratamiento anticoagulante?** (Por ejemplo, definición de su enfermedad, posibles complicaciones, tipos de tratamientos, interacciones, cuidados, hábitos alimenticios, etc.).

| Totalmente<br>en<br>desacuerdo | En<br>desacuerdo | Ni acuerdo<br>ni en<br>desacuerdo | De<br>acuerdo | Totalmente<br>de<br>acuerdo |
|--------------------------------|------------------|-----------------------------------|---------------|-----------------------------|
|--------------------------------|------------------|-----------------------------------|---------------|-----------------------------|

En general, considero que estoy bien informado sobre mi enfermedad.

Considero que estoy bien informado/a sobre las posibles complicaciones debidas a mi enfermedad.

Considero que estoy bien informado/a sobre las alternativas de tratamiento anticoagulante disponibles para mí.

En general, considero que estoy bien informado/a sobre el tratamiento anticoagulante que recibo en la actualidad.

Considero que estoy bien informado/a sobre las posibles interacciones de mi tratamiento anticoagulante con otros fármacos.

Considero que estoy bien informado/a sobre las posibles interacciones de mi tratamiento anticoagulante con ciertos alimentos.

Considero que estoy bien informado/a sobre los agentes de reversión\* (antídotos) de mi tratamiento.

\*antídotos que puedan neutralizar el efecto anticoagulante del fármaco en casos de hemorragia severa o cirugías de urgencia.

Considero que estoy bien informado/a sobre las posibles complicaciones debidas a mi tratamiento anticoagulante (por ejemplo, riesgo de sangrados).

Considero que estoy bien informado/a sobre los riesgos de no tomar correctamente el tratamiento (dosis, duración, etc.)

**Deseo participar en las decisiones sobre mi tratamiento y que el médico tuviera en cuenta mis preferencias en el momento de elegir el tratamiento.**

| Totalmente en desacuerdo | En desacuerdo | Ni acuerdo ni en desacuerdo | De acuerdo | Totalmente de acuerdo |
|--------------------------|---------------|-----------------------------|------------|-----------------------|
|                          |               |                             |            |                       |

**Mi médico ha consensuado conmigo el tratamiento que recibo en base a mis preferencias.**

| Totalmente en desacuerdo | En desacuerdo | Ni acuerdo ni en desacuerdo | De acuerdo | Totalmente de acuerdo |
|--------------------------|---------------|-----------------------------|------------|-----------------------|
|                          |               |                             |            |                       |

## TRATAMIENTO

**Aproximadamente, ¿Cuándo empezó su tratamiento con anticoagulantes orales?**

- ☐ Menos de 1 año
- ☐ 1-4 años
- ☐ 5-9 años
- ☐ 10 o más años

**¿Quién le prescribió por primera vez su anticoagulante oral?**

- ☐ Lo desconozco
- ☐ Médico de cabecera (atención primaria)
- ☐ Médico especialista

Si la respuesta es B → Desplegable (Cardiólogo, internista, hematólogo, médico de urgencias, neurólogo, otros)

**¿El coste de su anticoagulante oral está cubierto por la seguridad social?**

- ☐ Sí, totalmente
- ☐ Sí, parcialmente (copago)
- ☐ No

5.3.1 Si la opción elegida es la C: señale el principal motivo por el que costea su tratamiento:

- ☐ Mejor eficacia

- ☐ Mayor comodidad de administración
- ☐ Facilita mi vida diaria
- ☐ Otros

**Incluyendo todos los medicamentos, relacionados o no con su fibrilación auricular, ¿cuántas pastillas toma diariamente?**

- ☐ De 1 a 3
- ☐ De 4 a 6
- ☐ De 7 a 9
- ☐ 10 o más

**¿Qué importancia tienen para usted cada una de las siguientes cuestiones relativas al tratamiento anticoagulante oral?**

|                                                                                                                              | Nada importante | Poco importante | Moderadamente importante | Bastante importante | Muy importante |
|------------------------------------------------------------------------------------------------------------------------------|-----------------|-----------------|--------------------------|---------------------|----------------|
| Tomar un anticoagulante oral que requiera consumir sólo una o dos pastillas al día                                           |                 |                 |                          |                     |                |
| Tomar un anticoagulante oral a dosis fijas (por ejemplo, no tener que partir las pastillas)                                  |                 |                 |                          |                     |                |
| Tomar un anticoagulante oral que no requiera un control estricto de mi dieta                                                 |                 |                 |                          |                     |                |
| Tomar un anticoagulante oral que no interaccione con otros fármacos                                                          |                 |                 |                          |                     |                |
| Tomar un anticoagulante oral con el que no necesite realizar analíticas frecuentes                                           |                 |                 |                          |                     |                |
| Tomar un anticoagulante oral del que exista un agente de reversión* (antídoto)                                               |                 |                 |                          |                     |                |
| *antídotos que puedan neutralizar el efecto anticoagulante del fármaco en casos de hemorragia severa o cirugías de urgencia. |                 |                 |                          |                     |                |
| Tomar un tratamiento anticoagulante oral disponible en el mercado desde hace muchos años                                     |                 |                 |                          |                     |                |

**Ordene de la 1ª a la 7ª las características del tratamiento anticoagulante, según la importancia que tienen para usted (siendo la 1ª la más importante y 7ª la menos importante).**

(Señale como 1ª la característica que tiene más importancia para usted. A continuación, señale como 2ª la siguiente característica en importancia para usted; y así sucesivamente hasta asignar la 7ª posición a la característica menos importante)

| Orden de importancia                               |
|----------------------------------------------------|
| Tomar 1 o 2 pastillas al día                       |
| Tratamiento a dosis fijas                          |
| Tratamiento que no restrinja mi dieta              |
| Tratamiento que no interaccione con otros fármacos |
| Tratamiento que no requiera analíticas frecuentes  |
| Tratamiento que tenga un agente de reversión       |
| Tratamiento que esté disponible desde hace años    |

**¿Cómo puntuaría la satisfacción con su tratamiento anticoagulante oral actual?**

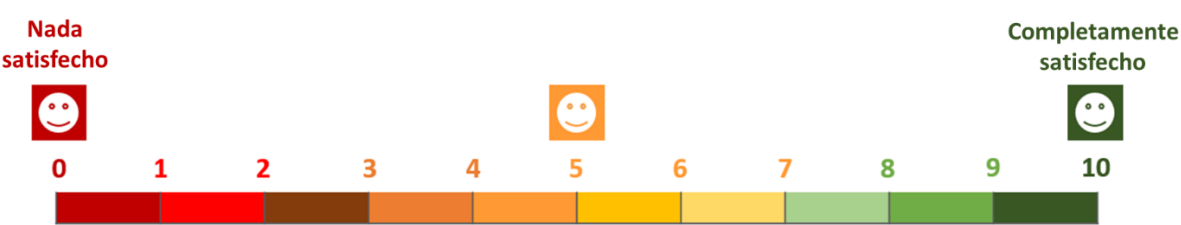

# CARGA DE LA FIBRILACIÓN AURICULAR Y BARRERAS

| Carga                                                                                                                                                                                                      | Totalmente en desacuerdo | En desacuerdo | Ni acuerdo ni en desacuerdo | De acuerdo | Totalmente de acuerdo |
|------------------------------------------------------------------------------------------------------------------------------------------------------------------------------------------------------------|--------------------------|---------------|-----------------------------|------------|-----------------------|
| <b>En general, mi tratamiento anticoagulante condiciona mi estilo de vida diario*</b>                                                                                                                      |                          |               |                             |            |                       |
| *Las actividades cotidianas personales y/o laborales, como ausentarse del trabajo o de compromisos personales debido a controles médicos relacionados con el tratamiento)                                  |                          |               |                             |            |                       |
| <b>Los efectos secundarios* de mi tratamiento interfieren en mis actividades diarias personales y/o laborales (como por ejemplo ausentarse del trabajo o de compromisos personales debido al malestar)</b> |                          |               |                             |            |                       |
| *(Efectos indeseados que se padecen como resultado directo del medicamento, como molestias gástricas o hemorragias leves o que necesiten acudir al hospital-, náuseas o dolor de cabeza)                   |                          |               |                             |            |                       |
| <b>Los trámites necesarios para obtener mi fármaco anticoagulante interfieren en mis actividades diarias (personales y/o laborales)</b>                                                                    |                          |               |                             |            |                       |
| *Receta u otros trámites/documentos (por ejemplo, el visado de inspección)                                                                                                                                 |                          |               |                             |            |                       |
| <b>La necesidad de realizarme analíticas frecuentes para el seguimiento de mi tratamiento interfiere en mis actividades diarias (personales y/o laborales)</b>                                             |                          |               |                             |            |                       |
| <b>Las posibles interacciones alimenticias con mi tratamiento anticoagulante condicionan mi vida diaria</b>                                                                                                |                          |               |                             |            |                       |
| <b>La distancia a mi centro de salud, en relación a las visitas de control de mi tratamiento, interfiere en mis actividades diarias (personales y/o laborales)</b>                                         |                          |               |                             |            |                       |

## Barreras

| Totalmente en desacuerdo | En desacuerdo | Ni acuerdo ni en desacuerdo | De acuerdo | Totalmente de acuerdo |
|--------------------------|---------------|-----------------------------|------------|-----------------------|
|--------------------------|---------------|-----------------------------|------------|-----------------------|

**Puedo acceder a mi tratamiento anticoagulante oral de manera sencilla**

**La distancia a mi centro de salud dificulta que pueda acudir a las visitas de control de mi tratamiento**

¿Qué agente gestiona el visado de inspección para obtener su tratamiento anticoagulante?

- ☐ Médico de cabecera (atención primaria)
- ☐ Médico especialista (Cardiólogo, internista, hematólogo, médico de urgencias, neurólogo, otros).
- ☐ Inspector/a de sanidad
- ☐ Farmacéutico/a
- ☐ Otros: \_\_\_\_\_

**¿Cómo es el visado de inspección, necesario para obtener su tratamiento anticoagulante oral?**

- ☐ En papel      ☐ Electrónico/informatizado      ☐ No sabe/no contesta

**¿Cómo definiría la complejidad de los trámites relacionados con su visado de inspección?**

| Muy compleja | Bastante compleja | Relativamente compleja | Poco compleja | Nada compleja |
|--------------|-------------------|------------------------|---------------|---------------|
|--------------|-------------------|------------------------|---------------|---------------|

**La necesidad de un visado de inspección interfiere en la decisión de tomar el medicamento**

| Muy en desacuerdo | Bastante en desacuerdo | Ni acuerdo ni en desacuerdo | Bastante de acuerdo | Muy de acuerdo |
|-------------------|------------------------|-----------------------------|---------------------|----------------|
|-------------------|------------------------|-----------------------------|---------------------|----------------|
