# Supplementary material
Source: Elsevier journal article supplement (https://www.sciencedirect.com/science/article/pii/S2603924918300533)
Supplement: mmc2 [file S2603924918300533:mmc2.pdf]

Tabla suplementaria 2: Asociaciones de pacientes participantes en el estudio

| Asociación    | Sub-asociaciones                                                                    |                                                                                                 |
|---------------|-------------------------------------------------------------------------------------|-------------------------------------------------------------------------------------------------|
| FEASAN        | AMCA<br>Associació de Malalts Cardíacs i Anticoagulats d'Ontinyent                  | ASPAYPVC<br>Asociación Sevillana de Pacientes Anticoagulados y Portadores de Válvulas Cardíacas |
|               | ACPA<br>Asociación Cordobesa de Pacientes Anticoagulados                            | AMAC<br>Asociación Madrileña de Pacientes Anticoagulados y Cardiovasculares                     |
|               | ACAP<br>Asociación de Pacientes Cardíacos y Anticoagulados Portuenses               | AVAC<br>Asociación Valenciana de Anticoagulados y Portadores de Válvulas Cardíacas              |
|               | APACAM<br>Asociación de Pacientes Cardiopatas y Anticoagulados de La Coruña         | Associació d'anticoagulats de Lleida                                                            |
| Cardioalianza | AEPOVAC<br>Asociación Española de Portadores de Válvulas Cardíacas y Anticoagulados | APACOR<br>Asociación de Pacientes Coronarios                                                    |
|               | Corazón sin Fronteras                                                               | FAGIMCOR<br>Federació d'Associacions Gironines de Malalties del Cor                             |
|               | Fundación española del corazón                                                      | FAECO<br>Federación Andaluza de Asociaciones de Enfermos del Corazón                            |
| FEI           | AVECE<br>Associació Catalana de persones amb Accident Vascular Cerebral             | NEURO-AFEIC<br>Asociación de Familiares y Enfermos de Ictus                                     |
|               | ADAI-CV<br>Asociación de afectados de ictus de la Comunidad Valenciana              | Ictus Asociación Madrileña                                                                      |
| APAM          | APAM Asociación de Pacientes Anticoagulados y Coronarios de Málaga                  |                                                                                                 |
